# Supplementary material for: First record of Oceanic Anoxic Event 2 in the Eastern Carpathians: implications for chemostratigraphic and biostratigraphic correlations
Source: Frontiers journal article supplement (doi:10.3389/feart.2023.1155482), 2023-09-06
Supplement: Table_1.XLS [file Table_1.XLS]

## Sheet: Sheet1
STAGE	SAMPLE	PRESERVATION	Ahmuellerella octoradiata	Axopodorhabdus albianus	Biscutum constans	Corollithion kennedyi	Cretarhabdus conicus	Cretarhabdus striatus	Cribrosphaerella ehrenbergii	Crucibiscutum salebrosum	Eiffellithus gorkae	Eiffellithus turriseiffelii	Eprolithus floralis	Eprolithus moratus	Eprolithus octopetalus	Helenea chiastia	Lithraphidites acutus	Lucianorhabdus maleformis	Manivitella pemmatoidea	Microrhabdulus decoratus	Microrhabdulus belgicus	Nannoconus elongatus	Nannoconus multicadus	Nannoconus truittii	Prediscosphaera cretacea	Prediscosphaera ponticula	Prediscosphaera spinosa	Quadrum gartneri	Quadrum intermedium	Retecapsa angustiforata	Rhagodiscus asper	Rhagodiscus angustus	Rhagodiscus infinitus	Rhagodiscus splendens	Repagulum parvidentatum	Seribiscutum primitivum	Staurolithites laffitei	Staurolithites stradneri	Watznaueria barnesiae	Zeugrhabdotus embergeri	Zeugrhabdotus erectus	NANNOFOSSIL	ZONES/SUBZONES
	49	25	P		C		R		R		R	C	A	F	R			F	R	F		F	F	C	C	F	R	F	R			C	F	F					A	R	P
	48	26	P		C		P	P	F			C	A	F	F			F	F	F	P	R	R	C	C	R	R	F	R			C	F	F					A	R
	47	26			C				F		P	C	A	R	R			F	F	F		F	R	C	R	R	R	R	R	P		C	R	R			P		A	R	P
	46	27	F		F		P		C		R	R	A	R				P	C	F	R	F	F	C	C	P	P	F	R	P		C	P	P				P	A	R	P
N	45	28	R		R			P	C		P	C	A	R	R			P	C	F	F	P	F	C	F	R	R	R	R			C	P	R					A	P	P	7
A	44	25	P		R		R	R	F		R	A	A	R				P	C	R	R	R	F	C	C			R	R			C	P	P			P	P	A	P		C
I	43	23	R		R		P		F			R	A	R	P				F			F	P	C	C		P	P	P			C		P				P	A	R	P	U
N	42	21	R		R		P	P	R		P	R	A	R	P				F	F				F	C			R	P									P	A	P	P
O	41	18	R		P							R	A	R					R	R		P		F	F		P	P	R	P		F	P						A		P
R	40	15	R		P			P	R		P	F	C	R	P									F	F	P		P	P										A		P
U	39	13					P		F			P	C	P	P				R						F		P	P				F		F					A	R
T	38	11					P		R		P	P	F	P					P	P					F			P				F							A
	37	9										P	F	P	P					P					F							F		P					A			6	b
	36	8									P	R	F												P					R		R	P						A			C
	35	8										R	F		P					P					P							P							A	R		U	a
	34	7										R	F			P									P							P	P						A
	33	7										R	F																R			R		P					A	P			c
	32	6										R	F							P					P							R							A
	31	6										P	F												P				P			P							A
	30	3											R			P															P								A	P		5
	29	5											F																		P	R		P					A	P		C
	28	5										P	R						O	A	E	2									P		P						A			U
	27	7										P	F			P								P							P	P							A				b
N	26	7							P			R	F			P								P							P								A
A	25	7										R	F											P							P	P							A
I	24	8										R	F											P	P						P	P							A	P
N	23	8		P								R	F			P								R	P														A	F
A	22	8			P							R	F			P								R							P								A	R			a
M	21	9		P	P				P			F	C				R							R							F								A	R
O	20	9		F	P							F	C			P	R							R							R								A	R
N	19	9			P				R		P	C	C				R							R							R								A	R		4
E	18	10		F	P						P	C	A			P								F							R	P							A			C
C	17	10		F	P				P			C	A				R							F							R								A	R		U
	16	10			P				R		P	C	A				R							F							R	P							A	R
	15	11		P	R				P			C	A				R						F	F							R	F							A
	14	11		F	R							C	A			P								F							R	F							A	P		e
	13	13		F	R		P		R		P	C	A				P							F							R	F	P						A			3
	12	16		F	R				P			C	A			P	R		P				F	F	P						F	F		P					A	P		C
	11	20		R	F		P		R		P	C	A			R	R	R	R					F	R					P	F	F	R						A	P	P	U
	10	22		P	F		P	P	F		P	C	A						R	P			R	F	F	R	R				F	R	R					P	A	P	P
	9	23		F	F			P	P		R	C	A			R	F		R	P	P		P	F		P	P				F	R		R				P	A	P	P
	8	24		F	F		P		P		R	C	A			R	F		P	P	P	P		F	P	P	R			P	F	F		R			P		A	P	P
	7	24		F	F	R		P	P		F	C	A			P	P		P		P	P	P	F	P	R	R				F	F		F			P	P	A	P
	6	25		R	F	R	P	P	P		P	C	A				F		P	P		R	R	C	F	P				P	C	R	P	P			P	P	A		P
	5	26		R	F	F	P		P		P	C	A			R	R		P	R	R	R	R	C	F	P	P				C	P	F	F					A	P	P	d
	4	27		R	F	F			P	P	P	R	A			R	P		P	P	P	R	P	R	F	R				P	C	P		R	R	R			A	P	P	3
	3	28		R	C	R	P	P	R	P	P	C	A			F	R		R		R	P		R	F	P	R			P	C		R	R		R		P	A	P	P	U
	2	28		R	F	R	P	P	P	R	P	F	A			R	R		P	P	R		P	P	F	R	P				C	P		P	R	R	P		A	R	R	U
	1	30		R	C	R		P	R	R	P	F	A			R	F				P	R	F	F	C	F	R			P	C	R	R	R	R	R	P	R	A	P	R
	0	30		F	C	F	P		R	R	R	C	A			F	R		P	P		P	R	C	C	P	R			P	C	F	P	P	R		P	P	A	R	R
