# Supplementary material for: First record of Oceanic Anoxic Event 2 in the Eastern Carpathians: implications for chemostratigraphic and biostratigraphic correlations
Source: Frontiers journal article supplement (doi:10.3389/feart.2023.1155482), 2023-09-06
Supplement: Table_2.XLS [file Table_2.XLS]

## Sheet: Sheet1
m	sample	d13C	d18O
19.8	P49	2.11	-3.29
19.4	P48	2.41	-3.49
19	P47	2.38	-3.36
18.6	P46	2.25	-3.53
18.2	P45	2.36	-3.41
17.8	P44	2.24	-3.59	0
17.4	P43	2.32	-3.47
17	P42	2.26	-3.28
16.6	P41	2.4	-3.97
16.2	P40	2.26	-3.59
15.8	P39	2.99	-4.01
15.4	P38	2.91	-3.25
15	P37	3.17	-4.07
14.6	P36	2.83	-3.09
14.2	P35	2.97	-4.12
13.8	P34	2.66	-3.73
13.4	P33	2.58	-4.15
13	P32	3.38	-3.78
12.6	P31	3.22	-4.18
12.2	P30	3.09	-3.81
11.8	P29	3.19	-4.19
11.4	P28	3.28	-3.79
11	P27	3.03	-4.23
10.6	P26	3.73	-3.88
10.2	P25	3.57	-4.69
9.8	P24	3.89	-3.61
9.4	P23	3.52	-4.77
9	P22	3.21	-3.69
8.6	P21	3.57	-4.01
8.2	P20	3.98	-3.67
7.8	P19	3.21	-4.18
7.4	P18	3.05	-3.27
7	P17	3.11	-4.06
6.8	P16	2.96	-3.08
6.4	P15	2.79	-4.09
6	P14	2.89	-3.87
5.6	P13	3.44	-4.14
5.2	P12	2.99	-3.82
5	P11	3.51	-4.13
4.6	P10	2.86	-3.11
4.4	P9	3.62	-2.97
4	P8	3.68	-4.12
3.8	P7	2.21	-3.98
3.4	P6	2.28	-4.36
3	P5	2.48	-2.09
2.6	P4	2.42	-3.54
2.2	P3	2.34	-2.93
1.8	P2	2.51	-3.85
1.4	P1	2.06	-2.62
1	P0	2.37	-3.83
